# Supplementary material for: Transcriptional Regulation of gga-miR-451 by AhR:Arnt in Mycoplasma gallisepticum (HS Strain) Infection
Source: MDPI journal article supplement (doi:10.3390/ijms20123087), 2019-06-24
Supplement: s1 [file s1]

Figure S1

A

|               |        |       |       |                      |            |   |
|---------------|--------|-------|-------|----------------------|------------|---|
| V\$YY1_02     | 2 (+)  | 1.000 | 0.849 | atgagGCCATgcaggttcta | YY1        |   |
| V\$CAAT_01    | 3 (+)  | 0.837 | 0.843 | tgaggCCATGca         | CCAAT box  |   |
| V\$AREB6_01   | 10 (-) | 1.000 | 0.907 | atcCAGGTtctat        | AREB6      |   |
| V\$TATA_C     | 16 (-) | 0.841 | 0.804 | gTTCTAataa           | TATA       |   |
| V\$BARBIE_01  | 19 (+) | 1.000 | 0.907 | ctatAAAGCgggtgc      | Barbie Box |   |
| V\$AHRARNT_01 | 20 (+) | 0.820 | 0.805 | tataaagcGGGTGcag     | AhR/Arnt   | 2 |
| V\$USF_Q6     | 25 (-) | 0.886 | 0.828 | agcgGGTGCa           | USF        |   |
| V\$SREBP1_02  | 39 (+) | 0.800 | 0.887 | caGCACCccac          | SREBP-1    |   |
| V\$AHRARNT_01 | 39 (-) | 0.820 | 0.802 | cagCACCCcacaagc      | AhR/Arnt   | 2 |
| V\$BARBIE_01  | 46 (+) | 1.000 | 0.918 | ccacAAAGCagcggg      | Barbie Box |   |
| V\$VMAF_01    | 52 (-) | 0.870 | 0.805 | agcagcggggTCACCccga  | v-Maf      |   |
| V\$RORA1_01   | 53 (+) | 1.000 | 0.870 | gcagcggGGTCac        | RORalpha1  |   |
| V\$AP1_Q2     | 56 (-) | 0.962 | 0.935 | gcggGGTCAcc          | AP-1       |   |
| V\$AP1_Q4     | 56 (-) | 0.935 | 0.897 | gcggGGTCAcc          | AP-1       |   |
| V\$CREB_02    | 57 (-) | 0.820 | 0.819 | cggGGTCAcccc         | CREB       |   |

B

| Matrix ID                 | Name      | Score   | Relative score | Sequence ID | Start | End | Strand |
|---------------------------|-----------|---------|----------------|-------------|-------|-----|--------|
| MA0006.1                  | Ahr::Arnt | 5.29689 | 0.817304689639 | 1           | 9     | 14  | -      |
| Predicted sequence TGCATG |           |         |                |             |       |     |        |
| MA0006.1                  | Ahr::Arnt | 5.29689 | 0.817304689639 | 1           | 75    | 80  | +      |
| Predicted sequence TGGGTG |           |         |                |             |       |     |        |
| MA0006.1                  | Ahr::Arnt | 5.23853 | 0.81482862249  | 1           | 92    | 97  | -      |
| Predicted sequence TCGTTC |           |         |                |             |       |     |        |
| MA0006.1                  | Ahr::Arnt | 4.89067 | 0.800069129061 | 1           | 27    | 32  | +      |
| Predicted sequence CGGGTG |           |         |                |             |       |     |        |

Figure S1 Bioinformatics analysis of the potential transcription factors in gga-miR-451. (A) The prediction from Gene-regulation. (B) The prediction from JASPAR.

A

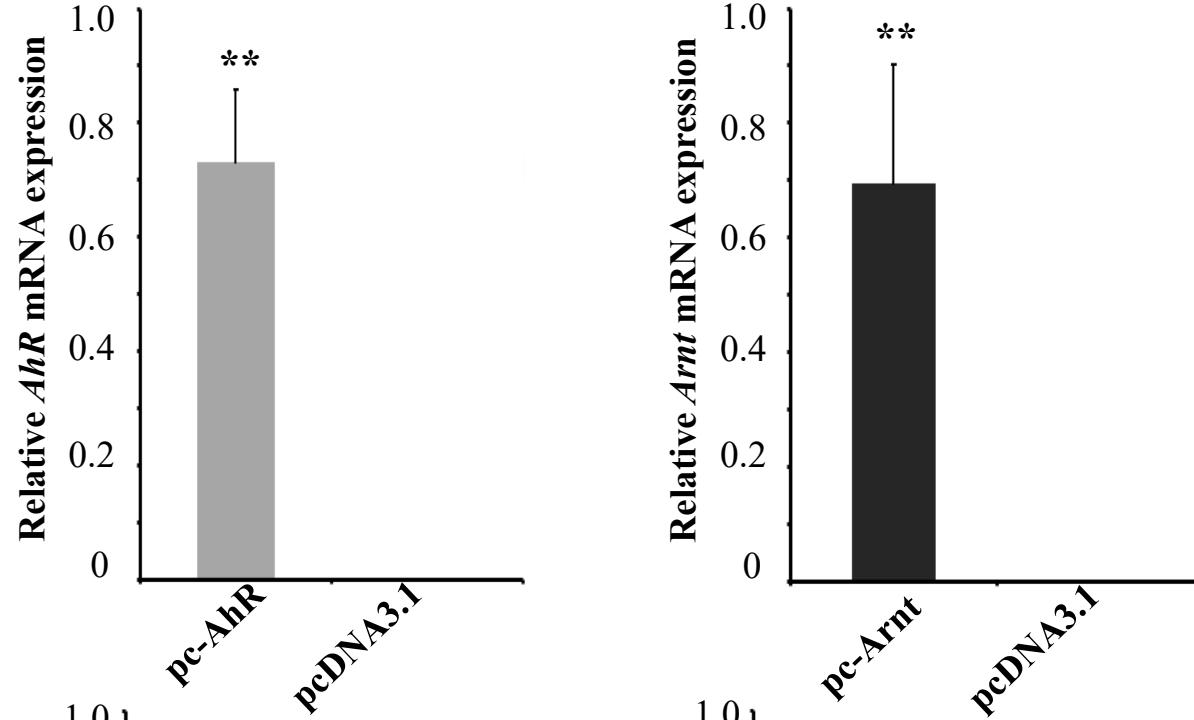

B

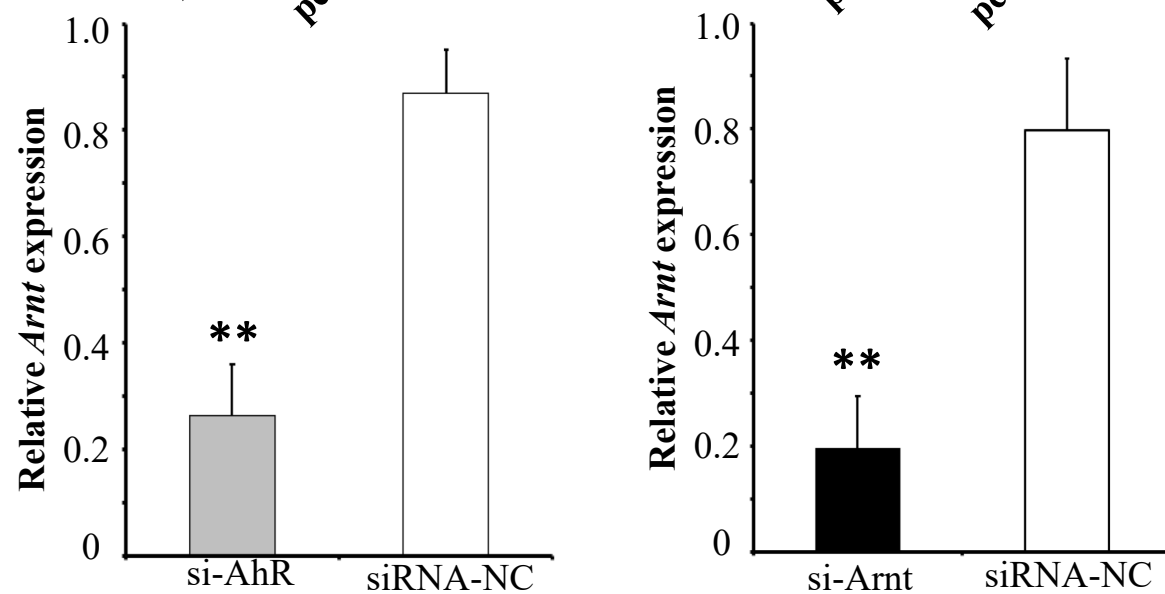

**Figure S2 Overexpression and silence of AhR and Arnt.** (A) DF-1 cells were transfected with pcDNA3.1-AhR (p-AhR), pcDNA3.1-Arnt (p-Arnt) or pcDNA3.1 for 48 h. (B) DF-1 cells were transfected with siRNA-AhR (si-AhR), siRNA-Arnt (si-Arnt) or siRNA NC for 48 h. AhR and Arnt mRNA levels were measured by RT-qPCR. The expression of GAPDH was used as a loading control.
